# Supplementary material for: Effects of a Cognitive Stimulation Program in Institutionalized Patients with Dementia
Source: MDPI journal article supplement (doi:10.3390/jpm12111808), 2022-11-01
Supplement: s1 [file s1]

**Table S1.** Organisational chart of the treatment programme.

| <b>Week</b>   | <b>Session 1</b>                                                                               | <b>Session 2</b>                                                                  |
|---------------|------------------------------------------------------------------------------------------------|-----------------------------------------------------------------------------------|
| <b>First</b>  | Temporal-spatial orientation<br>Attention /concentration<br>Gnosia                             | Temporal-spatial orientation<br>Attention /concentration<br>Praxis                |
| <b>Second</b> | Temporal-spatial orientation<br>Attention /concentration<br>Executive function (planification) | Temporal-spatial orientation<br>Attention /concentration<br>Semantic memory       |
| <b>Third</b>  | Temporal-spatial orientation<br>Attention /concentration<br>Sequencing                         | Temporal-spatial orientation<br>Attention /concentration<br>Categorisation        |
| <b>Fourth</b> | Temporal-spatial orientation<br>Attention /concentration<br>Language/verbal fluency            | Temporal-spatial orientation<br>Attention /concentration<br>Visual discrimination |
| <b>Fifth</b>  | Temporal-spatial orientation<br>Attention /concentration<br>Dressing praxis                    | Temporal-spatial orientation<br>Attention /concentration<br>Executive function    |

**Table S2:** Example of a session within the Occupational Therapy ADL cognitive stimulation programme

1.

| Cognitive function                  | Objective of the activity                                                                                   | Activity                                                                                                                                                                                                                                                                                                                                                                           |
|-------------------------------------|-------------------------------------------------------------------------------------------------------------|------------------------------------------------------------------------------------------------------------------------------------------------------------------------------------------------------------------------------------------------------------------------------------------------------------------------------------------------------------------------------------|
| <b>Temporal-spatial orientation</b> | To improve the orientation in time and space                                                                | With a picture of a clock, the patient has to indicate:<br>- what time it is,<br>- which ADL he/she performs at that time of the day,<br>- where does he/she perform that ADL.                                                                                                                                                                                                     |
| <b>Attention</b>                    | To stimulate the sustained attention through recognition                                                    | With a worksheet with different types of trousers, dresses and underwear, the patient has to indicate those that have the same colour.                                                                                                                                                                                                                                             |
| <b>Categorisation</b>               | To train the recognition of semantic categories and to improve categorisation in activities of daily living | With a worksheet that presents the picture of a table, the patient must write 5 types of food that need to be eaten with a spoon and 5 that need to be eaten with a fork.<br>Then, different categories and words that correspond to those categories are presented to the patient. He/she must tick the word that does not correspond to the category indicated by the therapist. |
